# Supplementary material for: Diverse traits of aquatic plants cannot individually explain their consumption by the generalist gastropod Biomphalairia glabrata
Source: PeerJ. 2021 Sep 20;9:e12031. doi: 10.7717/peerj.12031 (PMC8459730; doi:10.7717/peerj.12031)
Supplement: Supplemental Information 1 [file peerj-09-12031-s001.xlsx]

## Sheet: feeding assays 
Aquatic plant species	Fresh whole plant (% consumption)	Reconstituted plant (% consumption)	Plant extract (% inhibition)
P. illinoensis	0.8305	9	100
P. illinoensis	0.6338	3	100
P. illinoensis	0.7836	0	100
P. illinoensis	0.6709	5	100
P. illinoensis	0.4009	15	100
P. illinoensis	0.5012	3	100
P. illinoensis	0.2876	9	100
P. illinoensis	0.3813	4	100
P. illinoensis	0.3669	1	100
P. illinoensis	0.1017	3	100
P. illinoensis	0.252	1	100
P. illinoensis	0.1931	1	100
P. illinoensis	0.4915	24	100
P. illinoensis	0.6724	14	100
P. illinoensis		12	100
P. illinoensis		0	100
P. illinoensis		10	100
P. illinoensis		2	100
P. illinoensis		3	100
P. illinoensis		9
P. illinoensis		0
P. illinoensis		0
P. illinoensis		3
P. illinoensis		7
P. illinoensis		2
P. illinoensis		3
P. illinoensis		1
P. illinoensis		6
P. illinoensis		0
P. illinoensis		2
X. brevifolia	0	44	64.4444
X. brevifolia	0	39	100
X. brevifolia	0	67	100
X. brevifolia	0	40	100
X. brevifolia	0	32	100
X. brevifolia	0	40	100
X. brevifolia	0	55	100
X. brevifolia	0	12	100
X. brevifolia	0	23	100
X. brevifolia	0	53	100
X. brevifolia	0	38	100
X. brevifolia	0	29	95.8333
X. brevifolia	0	37	100
X. brevifolia	0	18	100
X. brevifolia		24	100
X. brevifolia		21	100
X. brevifolia		51	100
X. brevifolia		4	78.4314
X. brevifolia		12	100
X. brevifolia		37	97.5
X. brevifolia		37	95.114
X. brevifolia		45
X. brevifolia		49
X. brevifolia		17
X. brevifolia		65
X. brevifolia		15
X. brevifolia		30
X. brevifolia		34
X. brevifolia		17
X. brevifolia		20
T. domingensis	1.7806	35	66.6667
T. domingensis	1.3692	62	100
T. domingensis	0.1387	50	100
T. domingensis	1.231	62	100
T. domingensis	2.6757	45	85
T. domingensis	0.2174	47	100
T. domingensis	2.3051	40	100
T. domingensis	1.1793	35	13.3333
T. domingensis	0.3557	15	90
T. domingensis	2.2982	47	100
T. domingensis	0.2001	25	100
T. domingensis	0.9573	37	90
T. domingensis	0.6429	46	80
T. domingensis	0.6089	48	100
T. domingensis		32	80.3279
T. domingensis		22	3.0303
T. domingensis		30	37.5
T. domingensis		25	58
T. domingensis		25	100
T. domingensis		30
T. domingensis		68
T. domingensis		41
T. domingensis		48
T. domingensis		54
T. domingensis		30
T. domingensis		59
T. domingensis		19
T. domingensis		19
T. domingensis		48
T. domingensis		45
N. humboldtiana	0.9629	6	100
N. humboldtiana	0.1595	9	97.619
N. humboldtiana	2.1376	0	81.8182
N. humboldtiana	0.1407	9	69.2308
N. humboldtiana	0.5403	30	97.7273
N. humboldtiana	1.3506	15	60
N. humboldtiana	5.7291	7	50
N. humboldtiana	0.1182	15	100
N. humboldtiana	2.8528	1	36.3636
N. humboldtiana	2.3892	20	63.6364
N. humboldtiana	1.3988	43	100
N. humboldtiana	0.2166	8	27.1429
N. humboldtiana	0.3805	40	66.6667
N. humboldtiana	0.213	12	39.4737
N. humboldtiana		11	50
N. humboldtiana		8	100
N. humboldtiana		16	77.7778
N. humboldtiana		4	81.5789
N. humboldtiana		5
N. humboldtiana		30
N. humboldtiana		17
N. humboldtiana		32
N. humboldtiana		24
N. humboldtiana		14
N. humboldtiana		15
N. humboldtiana		15
N. humboldtiana		1
N. humboldtiana		16
N. humboldtiana		40
N. humboldtiana		21
E. azurea	0.9193	3	85
E. azurea	5.5454	9	45
E. azurea	4.6252	4	60
E. azurea	3.9647	4	88.8889
E. azurea	2.2607	2	100
E. azurea	0.8176	8	100
E. azurea	2.6311	3	7.6923
E. azurea	0.903	0	80
E. azurea	2.3319	12	100
E. azurea	1.8618	21	100
E. azurea	1.5372	35	83.3333
E. azurea	1.1616	7	77.7778
E. azurea	0.8906	9	61.2903
E. azurea	0.6447	0	12.5
E. azurea		5	100
E. azurea		2	51.3889
E. azurea		8
E. azurea		19
E. azurea		1
E. azurea		2
E. azurea		8
E. azurea		0
E. azurea		2
E. azurea		9
E. azurea		7
E. azurea		41
E. azurea		7
E. azurea		2
E. azurea		0
E. azurea		4
U. foliasa	0	7	96.1538
U. foliasa	0	10	73.3333
U. foliasa	0	11	50
U. foliasa	0	1	41.1765
U. foliasa	0	5	96.1538
U. foliasa	0	18	64.7059
U. foliasa	0	4	53.8462
U. foliasa	0	5	67.5676
U. foliasa	0	0	51.4286
U. foliasa	0	11	100
U. foliasa	0	31	81.25
U. foliasa	0	32	18.75
U. foliasa	0	0	96.1538
U. foliasa	0	3	54.1667
U. foliasa		0	50
U. foliasa		2	77.2727
U. foliasa		13
U. foliasa		0
U. foliasa		5
U. foliasa		4
U. foliasa		4
U. foliasa		6
U. foliasa		7
U. foliasa		7
U. foliasa		8
U. foliasa		3
U. foliasa		20
U. foliasa		11
U. foliasa		0
U. foliasa		2
P. stratiotes	0	12	5.0847
P. stratiotes	0	32	96.7213
P. stratiotes	0	0	27.5862
P. stratiotes	0	5	1.5625
P. stratiotes	0	18	90
P. stratiotes	0	33	38.0952
P. stratiotes	0	1	45
P. stratiotes	0	3	59.0164
P. stratiotes	0	1	73.3333
P. stratiotes	0	12	35
P. stratiotes	0	1	35
P. stratiotes	0	25	5
P. stratiotes	0	9	19.1781
P. stratiotes	0	37	83.7838
P. stratiotes		29	58.6957
P. stratiotes		26	42.4242
P. stratiotes		30	69.5652
P. stratiotes		54	78.3784
P. stratiotes		43
P. stratiotes		53
P. stratiotes		23
P. stratiotes		58
P. stratiotes		32
P. stratiotes		23
P. stratiotes		59
P. stratiotes		11
P. stratiotes		15
P. stratiotes		27
P. stratiotes		12
P. stratiotes		25
E. interstincta	5.4858	39	51.8519
E. interstincta	3.0022	50	30.303
E. interstincta	0.5379	5	25.7143
E. interstincta	2.262	27	90.2439
E. interstincta	2.2577	35	33.3333
E. interstincta	2.7115	47	11.1111
E. interstincta	1.7536	48	87.5
E. interstincta	1.8972	7	56.5217
E. interstincta	4.677	4	70.9677
E. interstincta	1.4205	20	51.4706
E. interstincta	2.8701	30	22.0339
E. interstincta	0.7105	33	42.2535
E. interstincta	1.6893	56
E. interstincta	0.9678	41
E. interstincta		1
E. interstincta		27
E. interstincta		44
E. interstincta		6
E. interstincta		5
E. interstincta		18
E. interstincta		11
E. interstincta		67
E. interstincta		10
E. interstincta		41
E. interstincta		8
E. interstincta		8
E. interstincta		9
E. interstincta		4
E. interstincta		46
E. interstincta		42
S. auriculata	0.8335	28	7.6923
S. auriculata	0.9654	3	16.129
S. auriculata	1.2297	20	73.0769
S. auriculata	0.0864	13	3.8462
S. auriculata	0.2599	17	26.9231
S. auriculata	0.8421	27	13.3333
S. auriculata	0.4392	25	13.3333
S. auriculata	0.5953	10	13.3333
S. auriculata	0.3088	40	13.3333
S. auriculata	0.8746	18	13.3333
S. auriculata	0.8709	25
S. auriculata	0.5411	0
S. auriculata	0.463	1
S. auriculata	0.5448	0
S. auriculata		1
S. auriculata		15
S. auriculata		22
S. auriculata		19
S. auriculata		3
S. auriculata		27
S. auriculata		7
S. auriculata		3
S. auriculata		21
S. auriculata		3
S. auriculata		43
S. auriculata		12
S. auriculata		5
S. auriculata		9
S. auriculata		7
S. auriculata		5
O. salzmannii	0.7025	52	-25
O. salzmannii	2.6865	25	-25
O. salzmannii	2.9197	45	-80.7692
O. salzmannii	0.6338	5	-45.4545
O. salzmannii	0.8114	40	-96.2963
O. salzmannii	1.0498	28	-15.3846
O. salzmannii	4.1269	4	-100
O. salzmannii	4.3362	10	-48.7179
O. salzmannii	0.7521	7	-44.4444
O. salzmannii	0.4104	25	-72.7273
O. salzmannii	4.4639	27	-40
O. salzmannii	0.3657	12	-92.9825
O. salzmannii	1.2829	2	-100
O. salzmannii	1.8185	34	-94.7368
O. salzmannii		12	-100
O. salzmannii		25
O. salzmannii		45
O. salzmannii		20
O. salzmannii		19
O. salzmannii		29
O. salzmannii		32
O. salzmannii		37
O. salzmannii		29
O. salzmannii		42
O. salzmannii		40
O. salzmannii		22
O. salzmannii		27
O. salzmannii		36
O. salzmannii		18
O. salzmannii		33
H. nymphoides	1.4153	37
H. nymphoides	0.266	32
H. nymphoides	1.4407	24
H. nymphoides	1.9615	41
H. nymphoides	4.8582	33
H. nymphoides	2.3106	6
H. nymphoides	3.5714	7
H. nymphoides	2.9972	11
H. nymphoides	1.0632	0
H. nymphoides	6.8687	30
H. nymphoides	0.9495	16
H. nymphoides	1.3245	42
H. nymphoides	0.0032176	7
H. nymphoides	1.896	56
H. nymphoides		1
H. nymphoides		4
H. nymphoides		57
H. nymphoides		51
H. nymphoides		32
H. nymphoides		75
H. nymphoides		13
H. nymphoides		20
H. nymphoides		25
H. nymphoides		39
H. nymphoides		20
H. nymphoides		23
H. nymphoides		4
H. nymphoides		26
H. nymphoides		6
H. nymphoides		12
N. pulchella	1.754	15
N. pulchella	2.0072	32
N. pulchella	0.9052	3
N. pulchella	1.2443	16
N. pulchella	0.732	18
N. pulchella	2.1585	25
N. pulchella	2.1616	43
N. pulchella	2.2679	6
N. pulchella	2.2726	6
N. pulchella	1.0341	18
N. pulchella	0.042	24
N. pulchella	1.7895	10
N. pulchella	0.6374	31
N. pulchella	2.0613	18
N. pulchella		56
N. pulchella		38
N. pulchella		42
N. pulchella		15
N. pulchella		43
N. pulchella		67
N. pulchella		19
N. pulchella		66
N. pulchella		10
N. pulchella		46
N. pulchella		32
N. pulchella		26
N. pulchella		18
N. pulchella		25
N. pulchella		24
N. pulchella		68
C. thalictroides	0	3
C. thalictroides	0	43
C. thalictroides	0	0
C. thalictroides	0	50
C. thalictroides	0	23
C. thalictroides	0	62
C. thalictroides	0	43
C. thalictroides	0	12
C. thalictroides	0	13
C. thalictroides	0	13
C. thalictroides	0	46
C. thalictroides	0	5
C. thalictroides	0	27
C. thalictroides	0	27
C. thalictroides		1
C. thalictroides		20
C. thalictroides		8
C. thalictroides		15
C. thalictroides		2
C. thalictroides		17
C. thalictroides		27
C. thalictroides		19
C. thalictroides		20
C. thalictroides		59
C. thalictroides		28
C. thalictroides		13
C. thalictroides		24
C. thalictroides		42
C. thalictroides		35
C. thalictroides		28

## Sheet: Physical, nutritional and chemi
Aquatic plant species	Dry mass	Ash (%)	Lipid (%)	Nitrogen content (g% nitrogen)	Protein Content (g% protein)	Phenolic content GAE/g of the extract
X. brevifolia	38.96	17.03		0.93	5.8125	3.82
X. brevifolia	39.42	16.49		0.91	5.6875	3.84
X. brevifolia	39.89	16.76		0.97	6.0625	3.85
E. interstincta	28.73	7.02	1.23	1.02	6.375	49.12
E. interstincta	27.97	7.31	1.1	1.07	6.6875	49.1
E. interstincta	28.02	6.98	1.15	0.99	6.1875	49
T. domingensis	16.26	8.55	7.45	0.49	3.0625	77.95
T. domingensis	16.34	8.27	6.35	0.53	3.3125	77.91
T. domingensis	15.94	8.17	5.88	0.56	3.5	78.09
P. illinoensis	7.46	14.87	6.81	2.17	13.5625	63.95
P. illinoensis	7.4	14.97	6.42	1.95	12.1875	64.12
P. illinoensis	7.65	14.79	6.62	1.87	11.6875	63.9
H. nymphoides	6.62	25.39	7.78	1.72	10.75
H. nymphoides	6.58	25.13	8.64	1.83	11.4375
H. nymphoides	6.68	25.55	7.13	1.63	10.1875
N. humboldtiana	9.62	9.29	1.39	1.7	10.625	70.76
N. humboldtiana	9.88	9.43	1.5	1.63	10.1875	70.95
N. humboldtiana	8.77	9.37	1.43	1.54	9.625	70.84
N. pulchella	8.7	10.33	1.89	2.73	17.0625
N. pulchella	8.55	10.25	1.79	2.71	16.9375
N. pulchella	8.9	10.57	1.84	2.76	17.25
E. azurea	9.02	22.62	5.64	0.95	5.9375	29
E. azurea	9.68	23.27	4.95	0.97	6.0625	28.96
E. azurea	9.26	23.01	5.92	0.99	6.1875	28.97
S. auriculata	3.02	25.37	10.18	1.69	10.5625	41.81
S. auriculata	2.97	25.52	9.25	1.62	10.125	41.74
S. auriculata	3.15	25.19	9.02	1.55	9.6875	41.77
P. stratiotes		39.42	6.85	2.48	15.5	60.15
P. stratiotes		39.78	6.27	2.43	15.1875	60.07
P. stratiotes		38.86	6.07	2.46	15.375	60.12
C. thalictroides		16.03	31.76	1.57	9.8125
C. thalictroides		15.82	33.11	1.52	9.5
C. thalictroides		15.75	30.07	1.55	9.6875
O. salzmanni		15.27	21.53	0.45	2.8125	55.78
O. salzmanni		15.45	20.56	0.48	3	55.7
O. salzmanni		15.33	19.47	0.44	2.75	55.68
U. foliosa	3.41	21.55	11.65	1.68	10.5	47.03
U. foliosa	3.55	20.79	11.02	1.79	11.1875	47.12
U. foliosa	3.5	21.83	12.42	1.58	9.875	46.98
